# Supplementary material
Source: PubMed Central journal article supplement (PMC6427825)
Supplement: NIHMS1006776-supplement-Appendix_S3.pdf [file NIHMS1006776-supplement-Appendix_S3.pdf]

Appendix 3. Raw to t-score conversion tables for the CO-LIFE and the O-LIFE-US

**CO-LIFE**

The Childhood Oxford-Liverpool Inventory of Feelings and Experiences

| <b>Males</b> |         | <b>Females</b> |         |
|--------------|---------|----------------|---------|
| Raw Score    | T score | Raw Score      | T score |
| 43           | 33      | 43             | 34      |
| 44           | 34      | 44             | 34      |
| 45           | 34      | 45             | 35      |
| 46           | 34      | 46             | 35      |
| 47           | 35      | 47             | 35      |
| 48           | 35      | 48             | 36      |
| 49           | 35      | 49             | 36      |
| 50           | 36      | 50             | 37      |
| 51           | 36      | 51             | 37      |
| 52           | 36      | 52             | 37      |
| 53           | 37      | 53             | 38      |
| 54           | 37      | 54             | 38      |
| 55           | 37      | 55             | 39      |
| 56           | 38      | 56             | 39      |
| 57           | 38      | 57             | 39      |
| 58           | 39      | 58             | 40      |
| 59           | 39      | 59             | 40      |
| 60           | 39      | 60             | 41      |
| 61           | 40      | 61             | 41      |
| 62           | 40      | 62             | 41      |
| 63           | 40      | 63             | 42      |
| 64           | 41      | 64             | 42      |
| 65           | 41      | 65             | 43      |
| 66           | 41      | 66             | 43      |
| 67           | 42      | 67             | 43      |
| 68           | 42      | 68             | 44      |
| 69           | 43      | 69             | 44      |
| 70           | 43      | 70             | 45      |
| 71           | 43      | 71             | 45      |
| 72           | 44      | 72             | 45      |
| 73           | 44      | 73             | 46      |
| 74           | 44      | 74             | 46      |

|     |    |     |    |
|-----|----|-----|----|
| 75  | 45 | 75  | 47 |
| 76  | 45 | 76  | 47 |
| 77  | 45 | 77  | 47 |
| 78  | 46 | 78  | 48 |
| 79  | 46 | 79  | 48 |
| 80  | 46 | 80  | 49 |
| 81  | 47 | 81  | 49 |
| 82  | 47 | 82  | 49 |
| 83  | 48 | 83  | 50 |
| 84  | 48 | 84  | 50 |
| 85  | 48 | 85  | 51 |
| 86  | 49 | 86  | 51 |
| 87  | 49 | 87  | 52 |
| 88  | 49 | 88  | 52 |
| 89  | 50 | 89  | 52 |
| 90  | 50 | 90  | 53 |
| 91  | 50 | 91  | 53 |
| 92  | 51 | 92  | 54 |
| 93  | 51 | 93  | 54 |
| 94  | 52 | 94  | 54 |
| 95  | 52 | 95  | 55 |
| 96  | 52 | 96  | 55 |
| 97  | 53 | 97  | 56 |
| 98  | 53 | 98  | 56 |
| 99  | 53 | 99  | 56 |
| 100 | 54 | 100 | 57 |
| 101 | 54 | 101 | 57 |
| 102 | 54 | 102 | 58 |
| 103 | 55 | 103 | 58 |
| 104 | 55 | 104 | 58 |
| 105 | 55 | 105 | 59 |
| 106 | 56 | 106 | 59 |
| 107 | 56 | 107 | 60 |
| 108 | 57 | 108 | 60 |
| 109 | 57 | 109 | 60 |
| 110 | 57 | 110 | 61 |
| 111 | 58 | 111 | 61 |
| 112 | 58 | 112 | 62 |
| 113 | 58 | 113 | 62 |
| 114 | 59 | 114 | 62 |
| 115 | 59 | 115 | 63 |

|     |    |     |    |
|-----|----|-----|----|
| 116 | 59 | 116 | 63 |
| 117 | 60 | 117 | 64 |
| 118 | 60 | 118 | 64 |
| 119 | 61 | 119 | 64 |
| 120 | 61 | 120 | 65 |
| 121 | 61 | 121 | 65 |
| 122 | 62 | 122 | 66 |
| 123 | 62 | 123 | 66 |
| 124 | 62 | 124 | 66 |
| 125 | 63 | 125 | 67 |
| 126 | 63 | 126 | 67 |
| 127 | 63 | 127 | 68 |
| 128 | 64 | 128 | 68 |
| 129 | 64 | 129 | 68 |
| 130 | 64 | 130 | 69 |
| 131 | 65 | 131 | 69 |
| 132 | 65 | 132 | 70 |
| 133 | 66 | 133 | 70 |
| 134 | 66 | 134 | 70 |
| 135 | 66 | 135 | 71 |
| 136 | 67 | 136 | 71 |
| 137 | 67 | 137 | 72 |
| 138 | 67 | 138 | 72 |
| 139 | 68 | 139 | 72 |
| 140 | 68 | 140 | 73 |
| 141 | 68 | 141 | 73 |
| 142 | 69 | 142 | 74 |
| 143 | 69 | 143 | 74 |
| 144 | 70 | 144 | 75 |
| 145 | 70 | 145 | 75 |
| 146 | 70 | 146 | 75 |
| 147 | 71 | 147 | 76 |
| 148 | 71 | 148 | 76 |
| 149 | 71 | 149 | 77 |
| 150 | 72 | 150 | 77 |
| 151 | 72 | 151 | 77 |
| 152 | 72 | 152 | 78 |
| 153 | 73 | 153 | 78 |
| 154 | 73 | 154 | 79 |
| 155 | 73 | 155 | 79 |
| 156 | 74 | 156 | 79 |

|     |    |     |    |
|-----|----|-----|----|
| 157 | 74 | 157 | 80 |
| 158 | 75 | 158 | 80 |
| 159 | 75 | 159 | 81 |
| 160 | 75 | 160 | 81 |
| 161 | 76 | 161 | 81 |
| 162 | 76 | 162 | 82 |
| 163 | 76 | 163 | 82 |
| 164 | 77 | 164 | 83 |
| 165 | 77 | 165 | 83 |
| 166 | 77 | 166 | 83 |
| 167 | 78 | 167 | 84 |
| 168 | 78 | 168 | 84 |
| 169 | 79 | 169 | 85 |
| 170 | 79 | 170 | 85 |
| 171 | 79 | 171 | 85 |
| 172 | 80 | 172 | 86 |
| 173 | 80 | 173 | 86 |
| 174 | 80 | 174 | 87 |
| 175 | 81 | 175 | 87 |
| 176 | 81 | 176 | 87 |
| 177 | 81 | 177 | 88 |
| 178 | 82 | 178 | 88 |
| 179 | 82 | 179 | 89 |
| 180 | 82 | 180 | 89 |
| 181 | 83 | 181 | 89 |
| 182 | 83 | 182 | 90 |
| 183 | 84 | 183 | 90 |
| 184 | 84 | 184 | 91 |
| 185 | 84 | 185 | 91 |
| 186 | 85 | 186 | 91 |
| 187 | 85 | 187 | 92 |
| 188 | 85 | 188 | 92 |
| 189 | 86 | 189 | 93 |
| 190 | 86 | 190 | 93 |
| 191 | 86 | 191 | 93 |
| 192 | 87 | 192 | 94 |
| 193 | 87 | 193 | 94 |
| 194 | 87 | 194 | 95 |
| 195 | 88 | 195 | 95 |
| 196 | 88 | 196 | 95 |
| 197 | 89 | 197 | 96 |

|     |    |     |     |
|-----|----|-----|-----|
| 198 | 89 | 198 | 96  |
| 199 | 89 | 199 | 97  |
| 200 | 90 | 200 | 97  |
| 201 | 90 | 201 | 97  |
| 202 | 90 | 202 | 98  |
| 203 | 91 | 203 | 98  |
| 204 | 91 | 204 | 99  |
| 205 | 91 | 205 | 99  |
| 206 | 92 | 206 | 100 |
| 207 | 92 | 207 | 100 |
| 208 | 93 | 208 | 100 |
| 209 | 93 | 209 | 101 |
| 210 | 93 | 210 | 101 |
| 211 | 94 | 211 | 102 |
| 212 | 94 | 212 | 102 |
| 213 | 94 | 213 | 102 |
| 214 | 95 | 214 | 103 |
| 215 | 95 | 215 | 103 |

## O-LIFE-US

The Oxford-Liverpool Inventory of Feelings and Experiences-United States

### Males

### Females

| Raw Score | T score | Raw Score | T score |
|-----------|---------|-----------|---------|
| 43        | 31      | 43        | 30      |
| 44        | 32      | 44        | 31      |
| 45        | 32      | 45        | 31      |
| 46        | 32      | 46        | 32      |
| 47        | 33      | 47        | 32      |
| 48        | 33      | 48        | 32      |
| 49        | 33      | 49        | 33      |
| 50        | 34      | 50        | 33      |
| 51        | 34      | 51        | 34      |
| 52        | 34      | 52        | 34      |
| 53        | 35      | 53        | 34      |
| 54        | 35      | 54        | 35      |
| 55        | 36      | 55        | 35      |
| 56        | 36      | 56        | 36      |
| 57        | 36      | 57        | 36      |
| 58        | 37      | 58        | 37      |
| 59        | 37      | 59        | 37      |
| 60        | 37      | 60        | 37      |
| 61        | 38      | 61        | 38      |
| 62        | 38      | 62        | 38      |
| 63        | 39      | 63        | 39      |
| 64        | 39      | 64        | 39      |
| 65        | 39      | 65        | 40      |
| 66        | 40      | 66        | 40      |
| 67        | 40      | 67        | 40      |
| 68        | 40      | 68        | 41      |
| 69        | 41      | 69        | 41      |
| 70        | 41      | 70        | 42      |
| 71        | 41      | 71        | 42      |
| 72        | 42      | 72        | 42      |
| 73        | 42      | 73        | 43      |
| 74        | 43      | 74        | 43      |

|     |    |     |    |
|-----|----|-----|----|
| 75  | 43 | 75  | 44 |
| 76  | 43 | 76  | 44 |
| 77  | 44 | 77  | 45 |
| 78  | 44 | 78  | 45 |
| 79  | 44 | 79  | 45 |
| 80  | 45 | 80  | 46 |
| 81  | 45 | 81  | 46 |
| 82  | 45 | 82  | 47 |
| 83  | 46 | 83  | 47 |
| 84  | 46 | 84  | 48 |
| 85  | 47 | 85  | 48 |
| 86  | 47 | 86  | 48 |
| 87  | 47 | 87  | 49 |
| 88  | 48 | 88  | 49 |
| 89  | 48 | 89  | 50 |
| 90  | 48 | 90  | 50 |
| 91  | 49 | 91  | 51 |
| 92  | 49 | 92  | 51 |
| 93  | 50 | 93  | 51 |
| 94  | 50 | 94  | 52 |
| 95  | 50 | 95  | 52 |
| 96  | 51 | 96  | 53 |
| 97  | 51 | 97  | 53 |
| 98  | 51 | 98  | 53 |
| 99  | 52 | 99  | 54 |
| 100 | 52 | 100 | 54 |
| 101 | 52 | 101 | 55 |
| 102 | 53 | 102 | 55 |
| 103 | 53 | 103 | 56 |
| 104 | 54 | 104 | 56 |
| 105 | 54 | 105 | 56 |
| 106 | 54 | 106 | 57 |
| 107 | 55 | 107 | 57 |
| 108 | 55 | 108 | 58 |
| 109 | 55 | 109 | 58 |
| 110 | 56 | 110 | 59 |
| 111 | 56 | 111 | 59 |
| 112 | 56 | 112 | 59 |
| 113 | 57 | 113 | 60 |
| 114 | 57 | 114 | 60 |
| 115 | 58 | 115 | 61 |

|     |    |     |    |
|-----|----|-----|----|
| 116 | 58 | 116 | 61 |
| 117 | 58 | 117 | 61 |
| 118 | 59 | 118 | 62 |
| 119 | 59 | 119 | 62 |
| 120 | 59 | 120 | 63 |
| 121 | 60 | 121 | 63 |
| 122 | 60 | 122 | 64 |
| 123 | 61 | 123 | 64 |
| 124 | 61 | 124 | 64 |
| 125 | 61 | 125 | 65 |
| 126 | 62 | 126 | 65 |
| 127 | 62 | 127 | 66 |
| 128 | 62 | 128 | 66 |
| 129 | 63 | 129 | 67 |
| 130 | 63 | 130 | 67 |
| 131 | 63 | 131 | 67 |
| 132 | 64 | 132 | 68 |
| 133 | 64 | 133 | 68 |
| 134 | 65 | 134 | 69 |
| 135 | 65 | 135 | 69 |
| 136 | 65 | 136 | 70 |
| 137 | 66 | 137 | 70 |
| 138 | 66 | 138 | 70 |
| 139 | 66 | 139 | 71 |
| 140 | 67 | 140 | 71 |
| 141 | 67 | 141 | 72 |
| 142 | 67 | 142 | 72 |
| 143 | 68 | 143 | 72 |
| 144 | 68 | 144 | 73 |
| 145 | 69 | 145 | 73 |
| 146 | 69 | 146 | 74 |
| 147 | 69 | 147 | 74 |
| 148 | 70 | 148 | 75 |
| 149 | 70 | 149 | 75 |
| 150 | 70 | 150 | 75 |
| 151 | 71 | 151 | 76 |
| 152 | 71 | 152 | 76 |
| 153 | 71 | 153 | 77 |
| 154 | 72 | 154 | 77 |
| 155 | 72 | 155 | 78 |
| 156 | 73 | 156 | 78 |



|     |    |     |    |
|-----|----|-----|----|
| 157 | 73 | 157 | 78 |
| 158 | 73 | 158 | 79 |
| 159 | 74 | 159 | 79 |
| 160 | 74 | 160 | 80 |
| 161 | 74 | 161 | 80 |
| 162 | 75 | 162 | 80 |
| 163 | 75 | 163 | 81 |
| 164 | 76 | 164 | 81 |
| 165 | 76 | 165 | 82 |
| 166 | 76 | 166 | 82 |
| 167 | 77 | 167 | 83 |
| 168 | 77 | 168 | 83 |
| 169 | 77 | 169 | 83 |
| 170 | 78 | 170 | 84 |
| 171 | 78 | 171 | 84 |
| 172 | 78 | 172 | 85 |
| 173 | 79 | 173 | 85 |
| 174 | 79 | 174 | 86 |
| 175 | 80 | 175 | 86 |
| 176 | 80 | 176 | 86 |
| 177 | 80 | 177 | 87 |
| 178 | 81 | 178 | 87 |
| 179 | 81 | 179 | 88 |
| 180 | 81 | 180 | 88 |
| 181 | 82 | 181 | 89 |
| 182 | 82 | 182 | 89 |
| 183 | 82 | 183 | 89 |
| 184 | 83 | 184 | 90 |
| 185 | 83 | 185 | 90 |
| 186 | 84 | 186 | 91 |
| 187 | 84 | 187 | 91 |
| 188 | 84 | 188 | 91 |
| 189 | 85 | 189 | 92 |
| 190 | 85 | 190 | 92 |
| 191 | 85 | 191 | 93 |
| 192 | 86 | 192 | 93 |
| 193 | 86 | 193 | 94 |
| 194 | 87 | 194 | 94 |
| 195 | 87 | 195 | 94 |
| 196 | 87 | 196 | 95 |
| 197 | 88 | 197 | 95 |

|     |    |     |     |
|-----|----|-----|-----|
| 198 | 88 | 198 | 96  |
| 199 | 88 | 199 | 96  |
| 200 | 89 | 200 | 97  |
| 201 | 89 | 201 | 97  |
| 202 | 89 | 202 | 97  |
| 203 | 90 | 203 | 98  |
| 204 | 90 | 204 | 98  |
| 205 | 91 | 205 | 99  |
| 206 | 91 | 206 | 99  |
| 207 | 91 | 207 | 99  |
| 208 | 92 | 208 | 100 |
| 209 | 92 | 209 | 100 |
| 210 | 92 | 210 | 101 |
| 211 | 93 | 211 | 101 |
| 212 | 93 | 212 | 102 |
| 213 | 93 | 213 | 102 |
| 214 | 94 | 214 | 102 |
| 215 | 94 | 215 | 103 |
